# Supplementary material for: Long-Term (2007 to 2018) Energy and CO2 Fluxes over an Agriculture Ecosystem in the Southeastern Margin of the Tibetan Plateau
Source: Hindawi journal article supplement (doi:10.1155/2022/4329199), 2022-12-23
Supplement: f1 [file 4329199.f1.docx]

**

**

Figure S1. Wind rose at 10 m height from 2007 to 2018 at the Dali flux station.

**

**

Figure S2. Diurnal variations in the prevailing wind frequency at 10 m height from 2007 to 2018 at the Dali flux station. Each bar represents the highest frequency of wind direction during each hour. Ellipses represent the times of sunrise and sunset. The letter C represents the static wind.
